# Supplementary material for: Breakage-Reunion Domain of Streptococcus pneumoniae Topoisomerase IV: Crystal Structure of a Gram-Positive Quinolone Target
Source: PubMed Central journal article supplement (PMC1810434; doi:10.1371/journal.pone.0000301), 2007-03-21

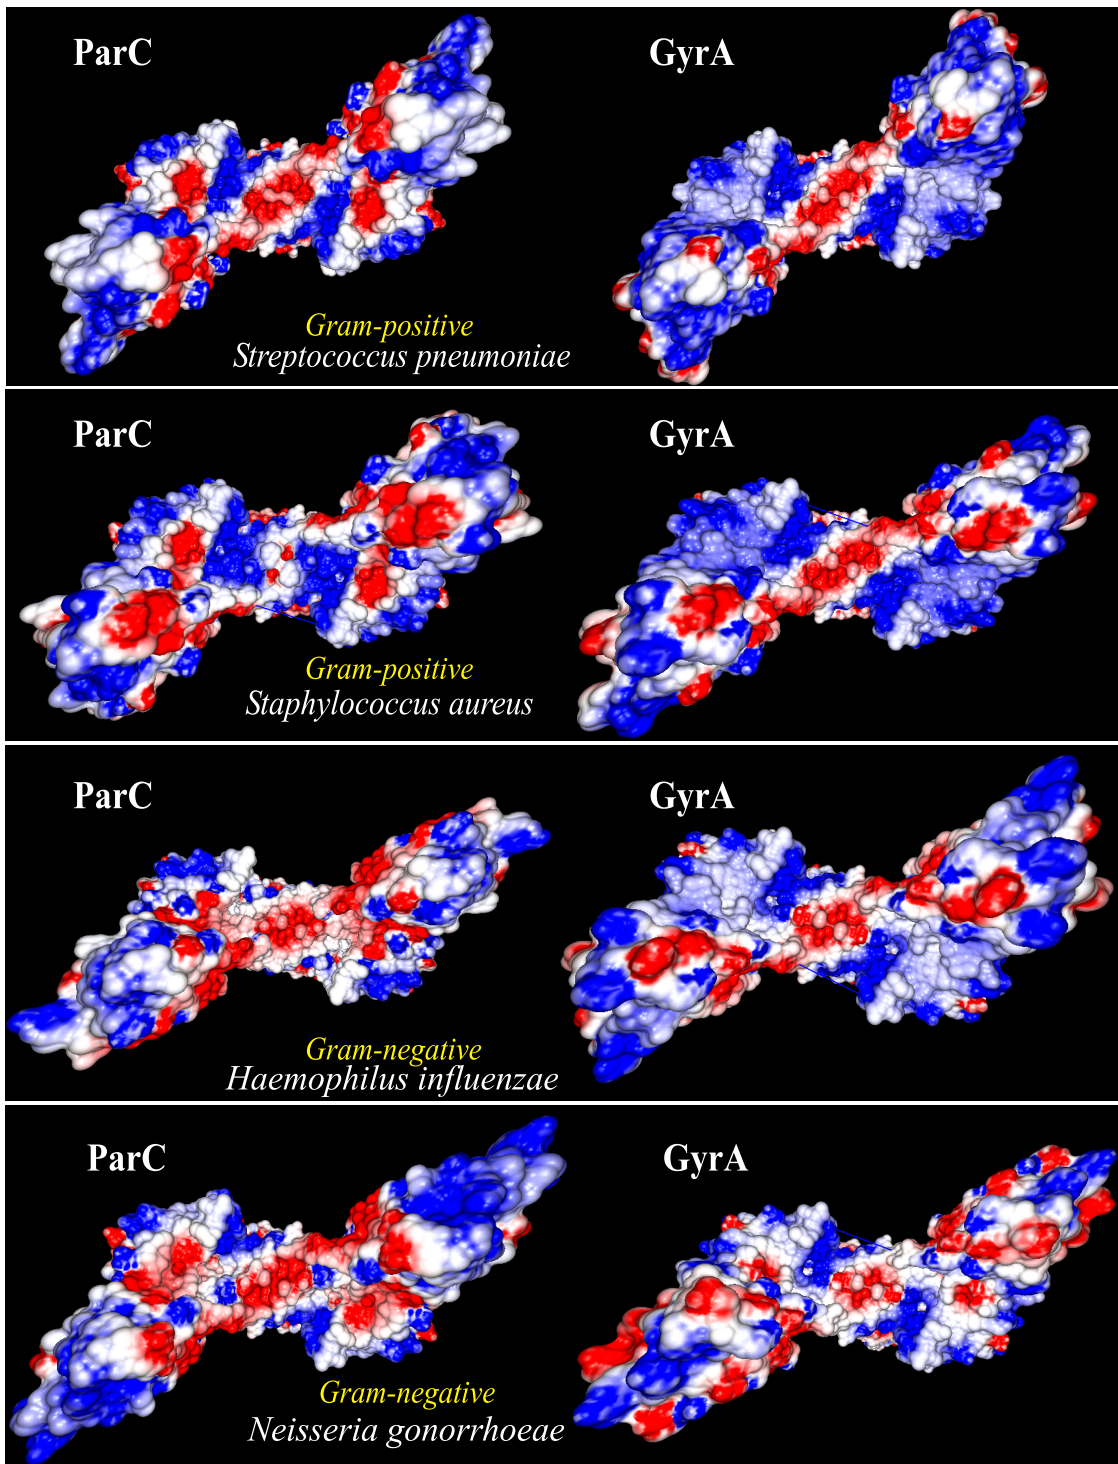

Supplement: pone.0000301.s001.pdf [file pone.0000301.s001.pdf]
